# Supplementary material
Source: PubMed Central journal article supplement (PMC6307875)
Supplement: jexbio-221-191429-s1.pdf [file jexbio-221-191429-s1.pdf]

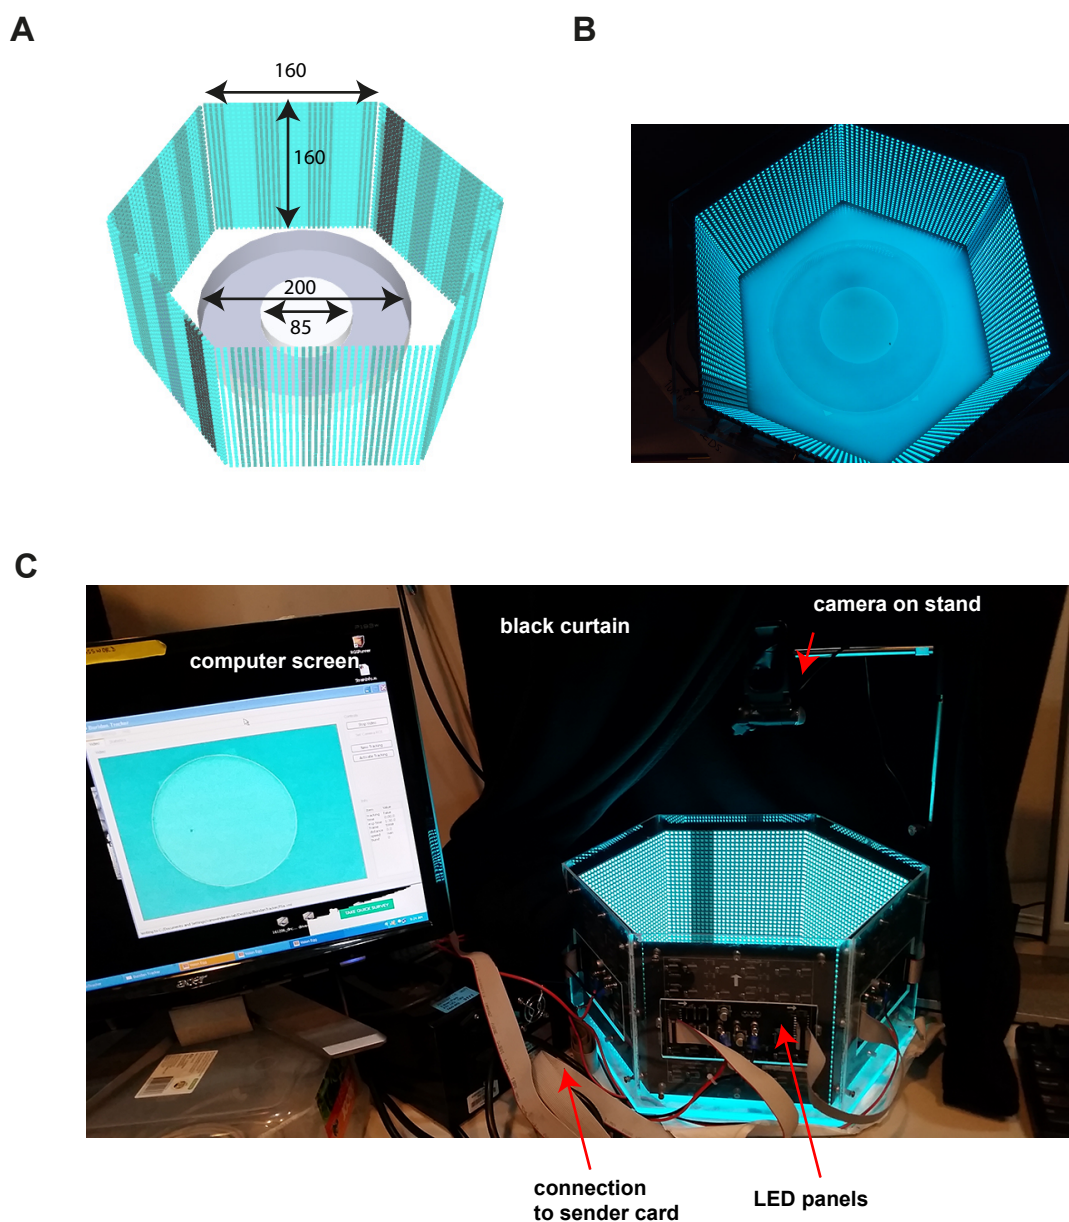

**Figure S1. Specifications of the visual arena.** A) Diagram of set-up (related to Figure 1A), indicating measurements in millimetres of LED panels (160 x 160mm), platform (85mm diameter) and moat (200mm). Platform and moat are 10mm in height (not shown). B) Aerial view of the arena. C) View of the entire set-up. 6 LED panels (Shenzen Sinorad, Medical Electronics, Shenzhen, China) were joined to form a hexagon. These panels have been discontinued, however the arena could also be built using a new model of bendable panels (which can be bent to form a circular arena) (SF2, Vuepix, Australia, <https://www.vuepix.tv/vuepix-product/sf2/>). LED panels are controlled with software on the computer (LED Studio for our panels, or Nova LCT Software with Vuepix panels) via a sender card connected to the LED panels. We used Buritrack software to track the fly's movements and analyse the data (Colomb et al, 2012). Any camera with 640 x 480 resolution or better (e.g. Logitech webcam) can be used. A black curtain was draped around the arena during experiments such that flies were not distracted by the external surroundings.

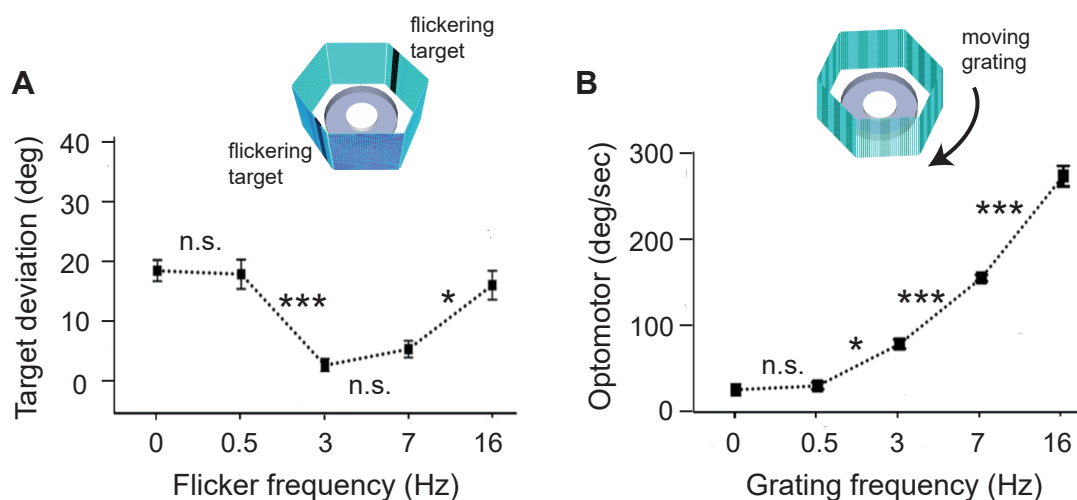

**Figure S2. Visual responses are modulated by flicker and grating frequency.** (A) Visual fixation in wild-type flies responding to fixation targets that were static (0 Hz) or flickering at 0.5 Hz, 3 Hz, 7 Hz, or 16 Hz. Lower target deviation indicates greater fixation.  $n = 14$  flies for each condition. Asterisks indicate significance between adjacent data points (2-way ANOVA with Tukey's correction). (B) Optomotor response in wild-type flies responding to gratings that were stationary (0 Hz) or rotating at 0.5 Hz, 3 Hz, 7 Hz, or 16 Hz. Higher optomotor index (OI) indicates greater optomotor response.  $n = 10$ . Asterisks indicate significance between adjacent points (A), significance via 2-way ANOVA with Tukey's correction. \*  $p < .05$ ; \*\*  $p < .01$ ; \*\*\*  $p < .001$ . Error bars show S.E.M.

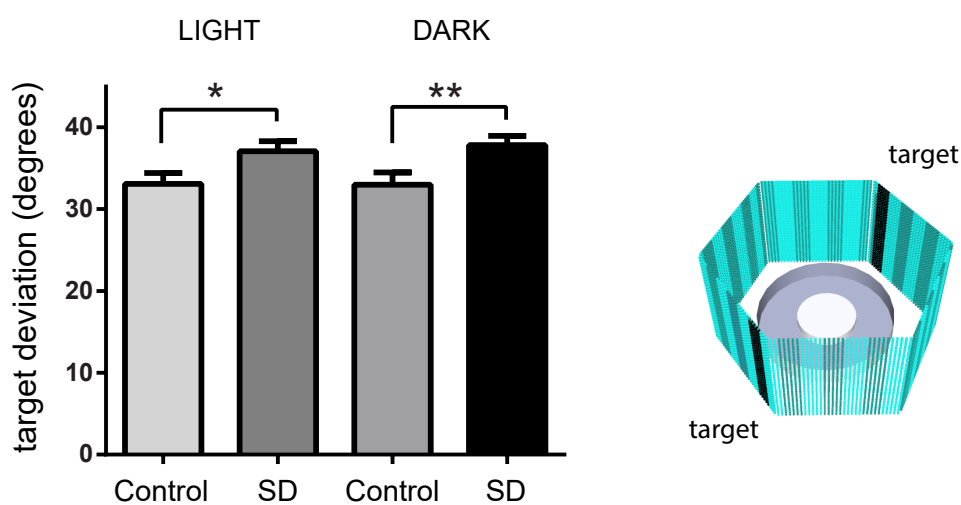

**Figure S3. Sleep deprivation effects on attention are independent of visual experience.** Target deviation during figure/ground discrimination in flies that were sleep deprived for 24 hrs in normal circadian conditions (light) or in 24 hrs of darkness (dark). The visual stimuli were a 7 Hz flickering object ('target') and a mid-luminance contrast grating (see methods).  $n > 19$  flies per data set. \* $p = 0.03$ , \*\* $p = 0.01$  by t-test. Error bars indicate the s.e.m.

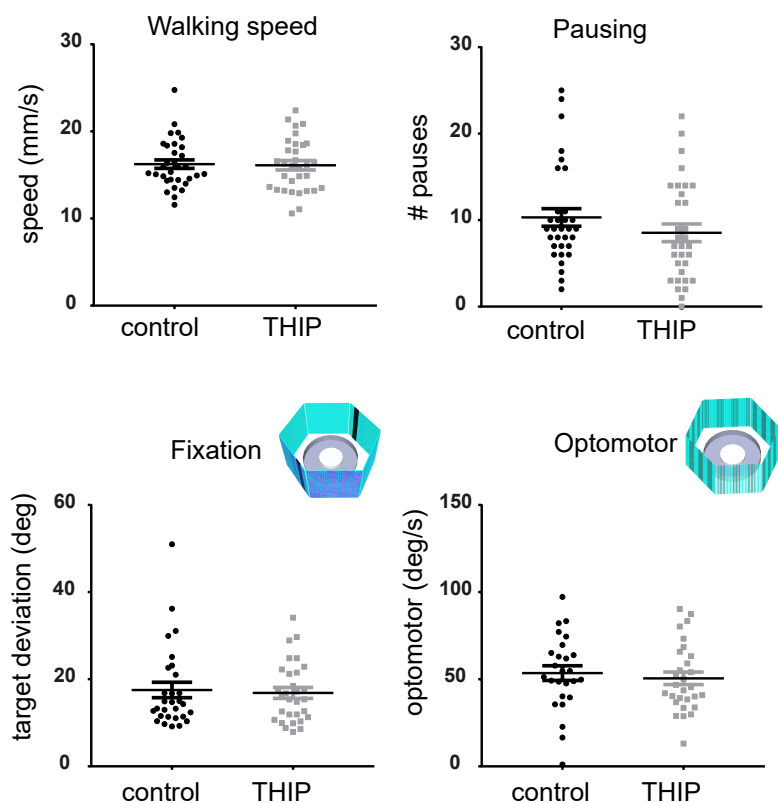

**Figure S4. Pausing, walking speed, fixation and optomotor behaviour in *dunce* mutants following induced sleep.** Sleep was induced by administering THIP for 48 hours (see Figure 6D) before testing in the visual arena, and compared to controls (*dunce* mutants without THIP treatment). A,B) Walking speed (A) and number of pauses (B) in *dunce* mutants with and without THIP treatment during the visual attention assay (same flies as Figure 6F). C, D) Fixation (C) and optomotor behaviour (D) in *dunce* mutants with and without THIP treatment.  $N > 30$  flies per experiment. No significant differences were observed between control and THIP treated flies (Mann-Whitney test).
